# Supplementary material for: Expression of Thomsen–Friedenreich Antigen in Colorectal Cancer and Association with Microsatellite Instability
Source: Int J Mol Sci. 2021 Jan 29;22(3):1340. doi: 10.3390/ijms22031340 (PMC7866256; doi:10.3390/ijms22031340)
Supplement: Supplementary file 1 [file ijms-22-01340-s001.pdf]

## Supplementary Materials

**Table S1.** Features of the TF expression in CCR tumours

|                                                             | Total     | TF Positive | TF Negative |
|-------------------------------------------------------------|-----------|-------------|-------------|
|                                                             | n (%)     | n (%)       | n (%)       |
|                                                             | 96 (100%) | 55 (57%)    | 41 (43%)    |
| <b>% of cell positivity</b>                                 |           |             |             |
| 0% - ≤ 5%                                                   | 41 (43%)  | 0 (0%)      | 41 (100%)   |
| >5% - <50%                                                  | 32 (33%)  | 32 (58%)    | 0 (0%)      |
| ≥50%                                                        | 23 (24%)  | 23 (42%)    | 0 (0%)      |
| <b>Staining intensity</b>                                   |           |             |             |
| Weak                                                        | 7 (7%)    | 7 (13%)     | 0 (0%)      |
| Strong                                                      | 48 (50%)  | 48 (87%)    | 0 (0%)      |
| Not applicable                                              | 41 (43%)  | 0 (0%)      | 41 (100%)   |
| <b>Intracellular staining</b>                               |           |             |             |
| Positive                                                    | 55 (57%)  | 55 (100%)   | 0 (0%)      |
| Negative                                                    | 41 (43%)  | 0 (0%)      | 41 (100%)   |
| <b>Localisation of intracellular staining<sup>1</sup></b>   |           |             |             |
| Membranous                                                  | 14 (26%)  | 14 (26%)    | 0 (0%)      |
| Cytoplasmatic                                               | 3 (5%)    | 3 (5%)      | 0 (0%)      |
| Both                                                        | 38 (69%)  | 38 (69%)    | 0 (0%)      |
| <b>Extracellular mucus staining</b>                         |           |             |             |
| Positive                                                    | 49 (51%)  | 49 (89%)    | 0 (0%)      |
| Negative                                                    | 47 (49%)  | 6 (11%)     | 41 (100%)   |
| <b>Location of extracellular mucus staining<sup>2</sup></b> |           |             |             |
| Intraglandular                                              | 32 (65%)  | 32 (65%)    | 0 (0%)      |
| Mucin pools                                                 | 8 (16%)   | 8 (16%)     | 0 (0%)      |
| Both                                                        | 9 (19%)   | 9 (19%)     | 0 (0%)      |

<sup>1</sup> Only positive cases for the intracellular staining (n=55) were analysed.

<sup>2</sup> Only positive cases for the extracellular mucus staining (n=49) were analysed.

**Table S2.** TF expression according to tumour grading of the CRC tumours

|                                                             | Total     | Low-grade | High-grade | p-value <sup>1</sup> |
|-------------------------------------------------------------|-----------|-----------|------------|----------------------|
|                                                             | n (%)     | n (%)     | n (%)      |                      |
|                                                             | 96 (100%) | 85 (89%)  | 11 (11%)   |                      |
| <b>% of cell positivity</b>                                 |           |           |            |                      |
| 0% - ≤ 5%                                                   | 41 (43%)  | 36 (42%)  | 5 (46%)    | 0.90                 |
| >5% - <50%                                                  | 32 (33%)  | 29 (34%)  | 3 (27%)    |                      |
| ≥50%                                                        | 23 (24%)  | 20 (24%)  | 3 (27%)    |                      |
| <b>Staining intensity</b>                                   |           |           |            |                      |
| Weak                                                        | 7 (7%)    | 7 (8%)    | 0 (0%)     | 0.42                 |
| Strong                                                      | 48 (50%)  | 42 (50%)  | 6 (54%)    |                      |
| Not applicable                                              | 41 (43%)  | 36 (42%)  | 5 (46%)    |                      |
| <b>Intracellular staining</b>                               |           |           |            |                      |
| Positive                                                    | 55 (57%)  | 49 (58%)  | 6 (54%)    | 0.55                 |
| Negative                                                    | 41 (43%)  | 36 (42%)  | 5 (46%)    |                      |
| <b>Location of intracellular staining<sup>2</sup></b>       |           |           |            |                      |
| Membranous                                                  | 14 (26%)  | 14 (29%)  | 0 (0%)     | 0.18                 |
| Cytoplasmatic                                               | 3 (5%)    | 2 (4%)    | 1 (17%)    |                      |
| Both                                                        | 38 (69%)  | 33 (67%)  | 5 (83%)    |                      |
| <b>Extracellular mucus staining</b>                         |           |           |            |                      |
| Positive                                                    | 49 (51%)  | 45 (53%)  | 4 (36%)    | 0.24                 |
| Negative                                                    | 47 (49%)  | 40 (47%)  | 7 (64%)    |                      |
| <b>Location of extracellular mucus staining<sup>3</sup></b> |           |           |            |                      |
| Intraglandular                                              | 32 (65%)  | 31 (69%)  | 1 (25%)    | 0.12                 |
| Mucin pools                                                 | 8 (16%)   | 6 (13%)   | 2 (50%)    |                      |
| Both                                                        | 9 (19%)   | 8 (18%)   | 1 (25%)    |                      |

<sup>1</sup> Pearson Chi-squared test and Fisher's Exact Test.

<sup>2</sup> Only positive cases for the intracellular staining (n=55) were analysed.

<sup>3</sup> Only positive cases for the extracellular mucus staining (n=49) were analysed.
